# Supplementary material for: Process–Based Identification of Key Tidal Creeks Influenced by Reclamation Activities
Source: MDPI journal article supplement (doi:10.3390/su15108123), 2023-05-17
Supplement: s1 [file s1]

---

## Supplementary Materials

**Table S1.** Dates of satellite images used for tidal creek extraction with corresponding Landsat sensor.

| <b>1985</b> | <b>1990</b> | <b>1995</b> | <b>2000</b> | <b>2005</b> | <b>2010</b> | <b>2015</b> | <b>2020</b> |
|-------------|-------------|-------------|-------------|-------------|-------------|-------------|-------------|
| <b>TM</b>   | <b>TM</b>   | <b>TM</b>   | <b>TM</b>   | <b>TM</b>   | <b>TM</b>   | <b>OLI</b>  | <b>OLI</b>  |
| 03/14       | 03/12       | 02/06       | 03/07       | 03/05       | 05/06       | 02/13       | 03/14       |
| 05/01       | 05/15       | 03/10       | 04/08       | 04/22       | 06/07       | 03/01       | 03/30       |
| 08/05       | 06/16       | 03/26       | 06/11       | 05/24       | 09/11       | 05/04       | 04/15       |
| 11/25       |             | 09/18       | 10/17       | 10/15       | 10/13       | 05/20       | 05/01       |
|             |             | 10/04       | 11/02       | 10/31       | 10/29       | 06/06       | 05/17       |
|             |             | 11/05       | 12/20       | 11/16       | 12/16       | 10/11       | 09/06       |
|             |             | 11/21       |             |             |             | 10/27       | 09/22       |
|             |             | 12/23       |             |             |             |             | 10/24       |

TM is short for Thematic Mapper that is the sensor carried by Landsat 4 and 5. OLI is short for Operational Land Imager that is the sensor carried by Landsat 8.
